# Supplementary material
Source: PubMed Central journal article supplement (PMC3457369)
Supplement: AAC.00878-12_zac999101226so1.pdf [file AAC.00878-12_zac999101226so1.pdf]

(Supplemental) TABLE 1. Sources of 305 isolates of ertapenem-non-susceptible *Enterobacteriaceae* collected in this study

| Hospital<br>(location in<br>Taiwan) and<br>source | No. (%) of isolates      |                                 |                            |                             |                              |                               |                             |                             |
|---------------------------------------------------|--------------------------|---------------------------------|----------------------------|-----------------------------|------------------------------|-------------------------------|-----------------------------|-----------------------------|
|                                                   | <i>E. coli</i><br>(n=64) | <i>K. pneumoniae</i><br>(n=219) | <i>K. oxytoca</i><br>(n=1) | <i>E. cloacae</i><br>(n=15) | <i>E. aerogenes</i><br>(n=2) | <i>S. marcescens</i><br>(n=2) | <i>C. diversus</i><br>(n=1) | <i>C. freundii</i><br>(n=1) |
| <b>Hospital</b>                                   |                          |                                 |                            |                             |                              |                               |                             |                             |
| A (northern)                                      | 23                       | 58                              | 1                          | 0                           | 0                            | 0                             | 0                           | 0                           |
| B (northern)                                      | 7                        | 29                              | 0                          | 0                           | 0                            | 0                             | 0                           | 0                           |
| C (northern)                                      | 8                        | 32                              | 0                          | 1                           | 0                            | 0                             | 0                           | 0                           |
| D (northern)                                      | 1                        | 36                              | 0                          | 0                           | 0                            | 0                             | 0                           | 0                           |
| E (northern)                                      | 2                        | 9                               | 0                          | 5                           | 0                            | 1                             | 1                           | 1                           |
| F (northern)                                      | 1                        | 15                              | 0                          | 1                           | 0                            | 0                             | 0                           | 0                           |
| G (northern)                                      | 4                        | 19                              | 0                          | 0                           | 0                            | 0                             | 0                           | 0                           |
| H (central)                                       | 3                        | 5                               | 0                          | 1                           | 0                            | 0                             | 0                           | 0                           |
| I (central)                                       | 4                        | 11                              | 0                          | 2                           | 1                            | 0                             | 0                           | 0                           |
| J (southern)                                      | 1                        | 0                               | 0                          | 0                           | 0                            | 0                             | 0                           | 0                           |
| K (southern)                                      | 10                       | 5                               | 0                          | 5                           | 1                            | 1                             | 0                           | 0                           |
| <b>Sites of isolation</b>                         |                          |                                 |                            |                             |                              |                               |                             |                             |

|                        |    |     |   |   |   |   |   |   |
|------------------------|----|-----|---|---|---|---|---|---|
| Sputum                 | 3  | 104 | 0 | 7 | 0 | 1 | 1 | 0 |
| Urine                  | 36 | 52  | 1 | 5 | 1 | 0 | 0 | 0 |
| Blood                  | 9  | 26  | 0 | 0 | 0 | 0 | 0 | 0 |
| Pus or wound           | 9  | 25  | 0 | 2 | 0 | 0 | 0 | 0 |
| Cerebrospinal<br>fluid | 0  | 0   | 0 | 0 | 0 | 1 | 0 | 0 |
| Ascites                | 4  | 4   | 0 | 0 | 0 | 0 | 0 | 1 |
| Pleural effusion       | 0  | 1   | 0 | 0 | 0 | 0 | 0 | 0 |
| Bile                   | 2  | 2   | 0 | 1 | 1 | 0 | 0 | 0 |
| Catheter tips          | 1  | 5   | 0 | 2 | 0 | 0 | 0 | 0 |

---

(Supplemental) TABLE 2. Antimicrobial susceptibilities among 305 ertapenem-nonsusceptible (ertapenem minimum inhibitory concentration [MICs] of  $\geq 1$   $\mu\text{g/ml}$ ) *Enterobacteriaceae* isolates to 20 agents using the Phoenix MIC testing panel according the interpretive criteria recommended by the Clinical and Laboratory Standards Institute 2012 (12).

| Bacteria (no. of isolates) and agent | MIC ( $\mu\text{g/ml}$ ) |                   |                   | No. (%) of isolates |              |           |
|--------------------------------------|--------------------------|-------------------|-------------------|---------------------|--------------|-----------|
|                                      | Range                    | MIC <sub>50</sub> | MIC <sub>90</sub> | Susceptible         | Intermediate | Resistant |
| <i>Enterobacteriaceae</i> (n=305)    |                          |                   |                   |                     |              |           |
| Ampicillin                           | > 16                     | > 16              | > 16              | 0 (0)               | 0 (0)        | 305 (100) |
| Ampicillin-sulbactam                 | 16/8->16/8               | > 16/8            | > 16/8            | 0 (0)               | 7 (2)        | 298 (98)  |
| Cefazolin                            | > 16                     | > 16              | > 16              | 0 (0)               | 0 (0)        | 305 (100) |
| Cefametzole                          | 8->32                    | > 32              | > 32              | 9 (3)               | 6 (2)        | 290 (95)  |
| Cefotaxime                           | 2->16                    | > 16              | > 16              |                     |              |           |
| Cefepime                             | 2->16                    | > 16              | > 16              | 76 (25)             | 28 (9)       | 201 (66)  |
| Cefpirome                            | 2->32                    | > 32              | > 32              |                     |              |           |
| Piperacillin-tazobactam              | 4/4->64/4                | > 64/4            | > 64/4            | 33 (11)             | 23 (8)       | 249 (82)  |
| Ertapenem                            | 1->4                     | 2                 | > 4               | 0                   | 0            | 305 (100) |
| Imipenem                             | 1->8                     | 1                 | > 8               | 211 (69)            | 16 (5)       | 78 (26)   |
| Meropenem                            | 1->8                     | 1                 | 8                 | 249 (82)            | 8 (3)        | 48 (16)   |
| Aztreonam                            | 2->16                    | > 16              | > 16              | 25 (8)              | 10 (3)       | 270 (89)  |
| Gentamicin                           | 2->8                     | > 8               | > 8               | 132 (43)            | 4 (1)        | 169 (55)  |
| Amikacin                             | 8->32                    | 8                 | > 32              | 229 (75)            | 1 (0)        | 75 (25)   |
| Levofloxacin                         | 1->4                     | > 4               | > 4               | 43 (14)             | 6 (2)        | 256 (84)  |
| Ciprofloxacin                        | 0.5->2                   | > 2               | > 2               | 37 (12)             | 8 (3)        | 260 (85)  |
| Moxifloxacin                         | 1->4                     | > 4               | > 4               |                     |              |           |
| Trimethoprim-sulfamethoxazole        | 0.5/9.5->2/38            | > 2/38            | > 2/38            | 91 (30)             | -            | 214 (70)  |
| Tigecycline                          | 0.064-8                  | 0.5               | 2                 |                     |              |           |
| Colistin                             | 1->4                     | 1                 | 1                 |                     |              |           |

|                               |               |        |        |         |         |           |
|-------------------------------|---------------|--------|--------|---------|---------|-----------|
| <i>E. coli</i> (n=64)         |               |        |        |         |         |           |
| Ampicillin                    | > 16          | > 16   | > 16   | 0 (0)   | 0 (0)   | 64 (100)  |
| Ampicillin-sulbactam          | 16/8->16/8    | > 16/8 | > 16/8 | 0 (0)   | 5 (8)   | 59 (92)   |
| Cefazolin                     | > 16          | > 16   | > 16   | 0 (0)   | 0 (0)   | 64 (100)  |
| Cefmetazole                   | 8->32         | > 32   | > 32   | 6 (9)   | 3 (5)   | 55 (86)   |
| Cefotaxime                    | 2->16         | > 16   | > 16   |         |         |           |
| Cefepime                      | 2->16         | 16     | > 16   | 30 (47) | 12 (19) | 22 (34)   |
| Cefpirome                     | 2->32         | 32     | > 32   |         |         |           |
| Piperacillin-tazobactam       | 4/4->64/4     | > 64/4 | > 64/4 | 16 (25) | 9 (14)  | 39 (61)   |
| Ertapenem                     | 1->4          | 2      | > 4    | 0 (0)   | 0 (0)   | 64 (100)  |
| Imipenem                      | 1->8          | 1      | > 8    | 46 (72) | 5 (8)   | 13 (20)   |
| Meropenem                     | 1->8          | 1      | 4      | 54 (84) | 1 (2)   | 9 (14)    |
| Aztreonam                     | 2->16         | > 16   | > 16   | 1 (2)   | 4 (6)   | 59 (92)   |
| Gentamicin                    | 2->8          | > 8    | > 8    | 25 (39) | 1 (2)   | 38 (59)   |
| Amikacin                      | 8->32         | 8      | 8      | 62 (97) | 0 (0)   | 2 (3)     |
| Levofloxacin                  | 1->4          | > 4    | > 4    | 19 (30) | 0 (0)   | 45 (70)   |
| Ciprofloxacin                 | 0.5->2        | > 2    | > 2    | 18 (28) | 1 (2)   | 45 (70)   |
| Moxifloxacin                  | 1->4          | > 4    | > 4    |         |         |           |
| Trimethoprim-sulfamethoxazole | 0.5/9.5->2/38 | > 2/38 | > 2/38 | 27 (42) | -       | 37 (58)   |
| Tigecycline                   | 0.06-1        | 0.25   | 0.5    |         |         |           |
| Colistin                      | 1             | 1      | 1      |         |         |           |
| <i>K. pneumoniae</i> (n=219)  |               |        |        |         |         |           |
| Ampicillin                    | > 16          | > 16   | > 16   | 0 (0)   | 0 (0)   | 219 (100) |
| Ampicillin-sulbactam          | 16/8->16/8    | > 16/8 | > 16/8 | 0 (0)   | 1 (0)   | 218 (100) |
| Cefazolin                     | > 16          | > 16   | > 16   | 0 (0)   | 0 (0)   | 219 (100) |
| Cefmetazole                   | 8->32         | > 32   | > 32   | 3 (1)   | 3 (1)   | 213 (97)  |
| Cefotaxime                    | 2->16         | > 16   | > 16   |         |         |           |
| Cefepime                      | 2->16         | > 16   | > 16   | 34 (16) | 14 (6)  | 171 (78)  |
| Cefpirome                     | 2->32         | > 32   | > 32   |         |         |           |

|                               |               |        |        |          |        |           |
|-------------------------------|---------------|--------|--------|----------|--------|-----------|
| Piperacillin-tazobactam       | 4/4->64/4     | > 64/4 | > 64/4 | 11 (5)   | 11 (5) | 197 (90)  |
| Ertapenem                     | 1->4          | 2      | > 4    | 0 (0)    | 0 (0)  | 219 (100) |
| Imipenem                      | 1->8          | 1      | > 8    | 150 (68) | 9 (4)  | 60 (27)   |
| Meropenem                     | 1->8          | 1      | 8      | 175 (80) | 7 (3)  | 37 (17)   |
| Aztreonam                     | 2->16         | > 16   | > 16   | 21 (10)  | 5 (2)  | 193 (88)  |
| Gentamicin                    | 2->8          | > 8    | > 8    | 93 (43)  | 3 (1)  | 123 (56)  |
| Amikacin                      | 8->32         | 8      | > 32   | 145 (66) | 1 (0)  | 73 (33)   |
| Levofloxacin                  | 1->4          | > 4    | > 4    | 12 (6)   | 4 (2)  | 203 (92)  |
| Ciprofloxacin                 | 0.5->2        | > 2    | > 2    | 9 (4)    | 5 (2)  | 205 (94)  |
| Moxifloxacin                  | 1->4          | > 4    | > 4    |          |        |           |
| Trimethoprim-sulfamethoxazole | 0.5/9.5->2/38 | > 2/38 | >2/38  | 52 (24)  | -      | 167 (76)  |
| Tigecycline                   | 0.125-8       | 0.5    | 2      |          |        |           |
| Colistin                      | 1->4          | 1      | 1      |          |        |           |

*E. cloacae* (n=15)

|                         |            |        |        |          |        |          |
|-------------------------|------------|--------|--------|----------|--------|----------|
| Ampicillin              | > 16       | > 16   | > 16   | 0 (0)    | 0 (0)  | 15 (100) |
| Ampicillin-sulbactam    | 16/8->16/8 | > 16/8 | > 16/8 | 0 (0)    | 1 (7)  | 14 (93)  |
| Cefazolin               | > 16       | > 16   | > 16   | 0 (0)    | 0 (0)  | 15 (100) |
| Cefmetazole             | > 32       | > 32   | > 32   | 0 (0)    | 0 (0)  | 15 (100) |
| Cefotaxime              | 2->16      | > 16   | > 16   |          |        |          |
| Cefepime                | 2->16      | 8      | > 16   | 9 (60)   | 1 (7)  | 5 (33)   |
| Cefpirome               | 2->32      | 32     | > 32   |          |        |          |
| Piperacillin-tazobactam | 4/4->64/4  | > 64/4 | > 64/4 | 3 (20)   | 3 (20) | 9 (60)   |
| Ertapenem               | 1->4       | 4      | > 4    |          |        | 15 (100) |
| Imipenem                | 1->4       | 1      | 2      | 13 (87)  | 1 (7)  | 1 (7)    |
| Meropenem               | 1          | 1      | 1      | 15 (100) |        |          |
| Aztreonam               | 2->16      | > 16   | > 16   | 1 (7)    | 0 (0)  | 14 (93)  |
| Gentamicin              | 2->8       | 2      | > 8    | 11 (73)  | 0 (0)  | 4 (27)   |
| Amikacin                | 8          | 8      | 8      | 15 (100) |        |          |
| Levofloxacin            | 1->4       | 2      | > 4    | 8 (53)   | 0 (0)  | 7 (47)   |

|                               |               |         |        |         |        |         |
|-------------------------------|---------------|---------|--------|---------|--------|---------|
| Ciprofloxacin                 | 0.5->2        | 1       | > 2    | 8 (53)  | 0 (0)  | 7 (47)  |
| Moxifloxacin                  | 1->4          | 4       | > 4    |         |        |         |
| Trimethoprim-sulfamethoxazole | 0.5/9.5->2/38 | > 2/38  | > 2/38 | 7 (47)  | -      | 8 (53)  |
| Tigecycline                   | 0.38-4        | 2       | 4      |         |        |         |
| Colistin                      | 1->4          | 1       | 1      |         |        |         |
| Others (n=7) <sup>a</sup>     |               |         |        |         |        |         |
| Ampicillin                    | > 16          | > 16    | > 16   | 0 (0)   | 0 (0)  | 7 (100) |
| Ampicillin-sulbactam          | > 16/8        | > 16/8  | > 16/8 | 0 (0)   | 0 (0)  | 7 (100) |
| Cefazolin                     | > 16          | > 16    | > 16   | 0 (0)   | 0 (0)  | 7 (100) |
| Cefmetazole                   | > 32          | > 32    | > 32   | 0 (0)   | 0 (0)  | 7 (100) |
| Cefotaxime                    | 16->16        | > 16    | > 16   | 0 (0)   | 0 (0)  | 7 (100) |
| Cefepime                      | 2->16         | 16      | > 16   | 3 (43)  | 1 (14) | 3 (43)  |
| Cefpirome                     | 2->32         | 16      | > 32   |         |        |         |
| Piperacillin-tazobactam       | 8/4->64/4     | > 64/4  | > 64/4 | 3 (43)  | 0 (0)  | 4 (57)  |
| Ertapenem                     | 1->4          | 4       | > 4    | 0 (0)   | 0 (0)  | 7 (100) |
| Imipenem                      | 1->8          | 8       | > 8    | 2 (29)  | 1 (14) | 4 (57)  |
| Meropenem                     | 1-4           | 1       | 4      | 5 (71)  | 0 (0)  | 2 (29)  |
| Aztreonam                     | 2->16         | > 16    | > 16   | 2 (29)  | 1 (14) | 4 (57)  |
| Gentamicin                    | 2->8          | > 8     | > 8    | 3 (43)  | 0 (0)  | 4 (57)  |
| Amikacin                      | 8             | 8       | 8      | 7 (100) | 0 (0)  | 0 (0)   |
| Levofloxacin                  | 1->4          | 2       | 4      | 4 (57)  | 2 (29) | 1 (14)  |
| Ciprofloxacin                 | 0.5->2        | 2       | > 2    | 2 (29)  | 2 (29) | 3 (43)  |
| Moxifloxacin                  | 1->4          | 4       | > 4    |         |        |         |
| Trimethoprim-sulfamethoxazole | 0.5/9.5->2/38 | 0.5/9.5 | > 2/38 | 5 (71)  | -      | 2 (29)  |
| Tigecycline                   | 0.094-4       | 2       | 4      |         |        |         |
| Colistin                      | 1             | 1       | 1      |         |        |         |

<sup>a</sup> Includes *K. oxytoca* (n=1), *E. aerogenes* (n=2); *C. freundii* (n=1), *C. diversus* (n=1), and *S. marcescens* (n=2)
